# Supplementary material for: The numbers of peripheral regulatory T cells are reduced in patients with psoriatic arthritis and are restored by low-dose interleukin-2
Source: PubMed Central journal article supplement — Ther Adv Chronic Dis. 2020 Apr 27;11:2040622320916014. doi: 10.1177/2040622320916014 (PMC7236566; doi:10.1177/2040622320916014), 2020-04-27
Supplement: supplementary_figure.pdf [file supplementary_figure.pdf]

**Supplementary Table 1:** Clinical details of patients enrolled in the study.

| The random number of patients | Group          | Gender | Age (years) | Medications                                                                                 | Description of IL-2 related adverse effects |
|-------------------------------|----------------|--------|-------------|---------------------------------------------------------------------------------------------|---------------------------------------------|
| 001                           | Non-IL-2 group | female | 45          | Biological agents; Methotrexate; Leflunomide; Cyclophosphamide; NSAIDs.                     | None.                                       |
| 002                           | Non-IL-2 group | male   | 35          | Biological agents; Methotrexate; NSAIDs.                                                    | None.                                       |
| 003                           | Non-IL-2 group | female | 48          | Biological agents; Methotrexate; Rapamycin; NSAIDs.                                         | None.                                       |
| 004                           | IL-2 group     | female | 52          | Biological agents; Methotrexate; NSAIDs.                                                    | None.                                       |
| 005                           | IL-2 group     | male   | 35          | Biological agents; Leflunomide; Sulfasalazine; Total Glucosides of Paeony Capsules; NSAIDs. | None.                                       |
| 007                           | IL-2 group     | male   | 54          | Biological agents; Tretinoin tablets; NSAIDs.                                               | None.                                       |
| 008                           | Non-IL-2 group | male   | 57          | Tretinoin tablets; NSAIDs.                                                                  | None.                                       |
| 010                           | Non-IL-2 group | male   | 50          | Biological agents; NSAIDs.                                                                  | None.                                       |
| 012                           | Non-IL-2 group | female | 42          | Biological agents; Tretinoin tablets; Total Glucosides of Paeony Capsules.                  | None.                                       |
| 013                           | Non-IL-2 group | female | 24          | Biological agents; Total Glucosides of Paeony Capsules.                                     | None.                                       |
| 016                           | IL-2 group     | female | 54          | Biological agents; Methotrexate; NSAIDs.                                                    | None.                                       |
| 018                           | Non-IL-2 group | female | 47          | Rapamycin; Total Glucosides of Paeony Capsules; NSAIDs.                                     | None.                                       |
| 022                           | IL-2 group     | male   | 42          | Biological agents; Total Glucosides of Paeony Capsules; NSAIDs.                             | None.                                       |
| 024                           | IL-2 group     | female | 39          | Biological agents; NSAIDs.                                                                  | None.                                       |
| 026                           | IL-2 group     | male   | 29          | Biological agents; Tretinoin tablets; Total Glucosides of Paeony Capsules.                  | None.                                       |
| 030                           | Non-IL-2 group | male   | 51          | Biological agents; Methotrexate; Cyclophosphamide; NSAIDs.                                  | None.                                       |
| 033                           | Non-IL-2 group | female | 46          | Biological agents; Rapamycin; Tretinoin tablets; Sulfasalazine; NSAIDs.                     | None.                                       |
| 035                           | Non-IL-2 group | female | 38          | Biological agents; Rapamycin; Tretinoin tablets;                                            | None.                                       |
| 037                           | Non-IL-2 group | female | 28          | Biological agents; Rapamycin;                                                               | None.                                       |

|     |                |        |    |                                                                             |                                |
|-----|----------------|--------|----|-----------------------------------------------------------------------------|--------------------------------|
| 038 | Non-IL-2 group | male   | 43 | Biological agents;                                                          | None.                          |
| 039 | Non-IL-2 group | male   | 45 | Glucocorticoid; Methotrexate; Leflunomide; Cyclophosphamide;                | None.                          |
| 040 | Non-IL-2 group | male   | 40 | Methotrexate; NSAIDs.                                                       | None.                          |
| 042 | Non-IL-2 group | male   | 54 | Biological agents; Tretinoin tablets; NSAIDs.                               | None.                          |
| 043 | IL-2 group     | male   | 62 | Biological agents; Total Glucosides of Paeony Capsules.                     | Skin rash, relief after a week |
| 044 | IL-2 group     | male   | 53 | Methotrexate; Tretinoin tablets; NSAIDs.                                    | None.                          |
| 046 | Non-IL-2 group | female | 42 | Biological agents; Methotrexate.                                            | None.                          |
| 050 | Non-IL-2 group | female | 25 | Leflunomide.                                                                | None.                          |
| 051 | Non-IL-2 group | female | 38 | Biological agents; Rapamycin; NSAIDs.                                       | None.                          |
| 054 | Non-IL-2 group | male   | 38 | Biological agents; Rapamycin; Tretinoin tablets; NSAIDs.                    | None.                          |
| 055 | IL-2 group     | female | 43 | Biological agents; NSAIDs.                                                  | None.                          |
| 056 | IL-2 group     | male   | 23 | Biological agents; Thalidomide; Total Glucosides of Paeony Capsules.        | None.                          |
| 057 | Non-IL-2 group | male   | 70 | Biological agents; Rapamycin; Tretinoin tablets; NSAIDs.                    | None.                          |
| 060 | Non-IL-2 group | male   | 45 | Glucocorticoid; Biological agents; Tretinoin tablets; NSAIDs.               | None.                          |
| 062 | Non-IL-2 group | female | 45 | Biological agents; Tretinoin tablets; Total Glucosides of Paeony Capsules.  | None.                          |
| 064 | Non-IL-2 group | male   | 45 | Biological agents; Methotrexate; Cyclophosphamide; NSAIDs.                  | None.                          |
| 065 | IL-2 group     | female | 47 | Biological agents; Total Glucosides of Paeony Capsules; NSAIDs.             | None.                          |
| 066 | Non-IL-2 group | female | 53 | Rapamycin; Tretinoin tablets; NSAIDs.                                       | None.                          |
| 067 | Non-IL-2 group | male   | 45 | Biological agents; Methotrexate.                                            | None.                          |
| 068 | Non-IL-2 group | female | 33 | Biological agents; Rapamycin; Tretinoin tablets; NSAIDs.                    | None.                          |
| 069 | IL-2 group     | male   | 50 | Methotrexate; Tretinoin tablets; NSAIDs.                                    | None.                          |
| 074 | Non-IL-2 group | female | 43 | Glucocorticoid; Biological agents; Methotrexate; Tretinoin tablets; NSAIDs. | None.                          |

|     |                |        |    |                                                                            |       |
|-----|----------------|--------|----|----------------------------------------------------------------------------|-------|
| 076 | Non-IL-2 group | male   | 37 | Biological agents.                                                         | None. |
| 078 | Non-IL-2 group | female | 45 | Methotrexate; Rapamycin; Tretinoin tablets.                                | None. |
| 079 | Non-IL-2 group | female | 66 | Total Glucosides of Paeony Capsules.                                       | None. |
| 081 | Non-IL-2 group | female | 56 | Biological agents; Rapamycin; Tretinoin tablets; NSAIDs.                   | None. |
| 082 | Non-IL-2 group | male   | 61 |                                                                            | None. |
| 083 | Non-IL-2 group | male   | 47 | Biological agents;                                                         | None. |
| 084 | Non-IL-2 group | male   | 53 | Glucocorticoid; Methotrexate; Leflunomide; Cyclophosphamide; NSAIDs.       | None. |
| 085 | Non-IL-2 group | male   | 35 | Biological agents.                                                         | None. |
| 087 | IL-2 group     | female | 32 | Biological agents; Tretinoin tablets; Total Glucosides of Paeony Capsules. | None. |
| 090 | Non-IL-2 group | male   | 50 | Methotrexate; Thalidomide; Total Glucosides of Paeony Capsules.            | None. |
| 092 | IL-2 group     | female | 37 | Biological agents; Tretinoin tablets; Total Glucosides of Paeony Capsules. | None. |
| 094 | Non-IL-2 group | female | 52 | Glucocorticoid; Thalidomide; NSAIDs.                                       | None. |
| 095 | Non-IL-2 group | male   | 31 | Biological agents; Total Glucosides of Paeony Capsules.                    | None. |
| 098 | Non-IL-2 group | female | 26 | Total Glucosides of Paeony Capsules.                                       | None. |
| 099 | Non-IL-2 group | female | 58 | Methotrexate; NSAIDs.                                                      | None. |
| 101 | Non-IL-2 group | female | 33 | Biological agents; Rapamycin; NSAIDs.                                      | None. |
| 102 | Non-IL-2 group | female | 46 | Biological agents; Tretinoin tablets; Total Glucosides of Paeony Capsules. | None. |
| 103 | Non-IL-2 group | female | 56 | Methotrexate; Leflunomide; Thalidomide; NSAIDs.                            | None. |
| 104 | Non-IL-2 group | male   | 59 | Biological agents; Total Glucosides of Paeony Capsules; NSAIDs.            | None. |

|     |                |        |    |                                                                                               |       |
|-----|----------------|--------|----|-----------------------------------------------------------------------------------------------|-------|
| 106 | Non-IL-2 group | male   | 18 | Biological agents; Total Glucosides of Paeony Capsules.                                       | None. |
| 109 | Non-IL-2 group | female | 57 | Biological agents; NSAIDs.                                                                    | None. |
| 110 | IL-2 group     | female | 40 | Tretinoin tablets; NSAIDs.                                                                    | None. |
| 111 | IL-2 group     | female | 36 | Biological agents; Tretinoin tablets;                                                         | None. |
| 112 | Non-IL-2 group | male   | 52 | Biological agents; Leflunomide; Tretinoin tablets; NSAIDs.                                    | None. |
| 114 | Non-IL-2 group | female | 46 | Methotrexate; Sulfasalazine; NSAIDs.                                                          | None. |
| 116 | Non-IL-2 group | male   | 23 | Biological agents; Leflunomide; NSAIDs.                                                       | None. |
| 117 | Non-IL-2 group | male   | 51 | Biological agents; Methotrexate; Tretinoin tablets;                                           | None. |
| 118 | IL-2 group     | female | 39 | Biological agents.                                                                            | None. |
| 119 | Non-IL-2 group | male   | 64 | Biological agents.                                                                            | None. |
| 122 | IL-2 group     | female | 52 | Tretinoin tablets; Total Glucosides of Paeony Capsules; NSAIDs.                               | None. |
| 123 | Non-IL-2 group | female | 37 | Biological agents; Rapamycin.                                                                 | None. |
| 125 | Non-IL-2 group | female | 24 | Biological agents; Tretinoin tablets.                                                         | None. |
| 126 | Non-IL-2 group | male   | 47 | NSAIDs.                                                                                       | None. |
| 127 | Non-IL-2 group | female | 55 | Glucocorticoid; Biological agents; Methotrexate; Cyclophosphamide; NSAIDs.                    | None. |
| 129 | Non-IL-2 group | male   | 29 | Biological agents; Methotrexate; Tretinoin tablets; NSAIDs.                                   | None. |
| 130 | Non-IL-2 group | male   | 55 | Biological agents; Methotrexate.                                                              | None. |
| 132 | Non-IL-2 group | male   | 34 | Biological agents.                                                                            | None. |
| 134 | Non-IL-2 group | female | 29 | NSAIDs.                                                                                       | None. |
| 135 | IL-2 group     | male   | 53 | Biological agents; Tretinoin tablets; Total Glucosides of Paeony Capsules.                    | None. |
| 139 | IL-2 group     | male   | 61 | Glucocorticoid; Biological agents; Methotrexate; Total Glucosides of Paeony Capsules; NSAIDs. | None. |

|     |                |        |    |                                                            |       |
|-----|----------------|--------|----|------------------------------------------------------------|-------|
| 140 | Non-IL-2 group | male   | 51 | Biological agents; Methotrexate; Cyclophosphamide; NSAIDs. | None. |
| 142 | Non-IL-2 group | female | 56 | Biological agents; Methotrexate; Sulfasalazine; NSAIDs.    | None. |
| 143 | IL-2 group     | female | 62 | Biological agents; Methotrexate; Tretinoin tablets.        | None. |
| 144 | Non-IL-2 group | female | 33 | Tretinoin tablets.                                         | None. |
| 145 | Non-IL-2 group | male   | 63 | Leflunomide; Cyclophosphamide; Rapamycin; NSAIDs.          | None. |
| 146 | Non-IL-2 group | female | 26 | Biological agents; Tretinoin tablets.                      | None. |
| 148 | Non-IL-2 group | male   | 50 | Biological agents; Methotrexate; NSAIDs.                   | None. |
| 149 | Non-IL-2 group | female | 52 | Tretinoin tablets; NSAIDs.                                 | None. |
| 150 | Non-IL-2 group | female | 57 | NSAIDs.                                                    | None. |
| 151 | Non-IL-2 group | male   | 57 | Biological agents; Rapamycin; NSAIDs.                      | None. |
| 153 | Non-IL-2 group | female | 58 | Tretinoin tablets; NSAIDs.                                 | None. |
| 154 | Non-IL-2 group | male   | 54 | Biological agents; NSAIDs.                                 | None. |
| 157 | Non-IL-2 group | female | 55 | Biological agents; Methotrexate; Leflunomide; NSAIDs.      | None. |
| 158 | Non-IL-2 group | female | 22 | Biological agents; Rapamycin; Sulfasalazine.               | None. |

---

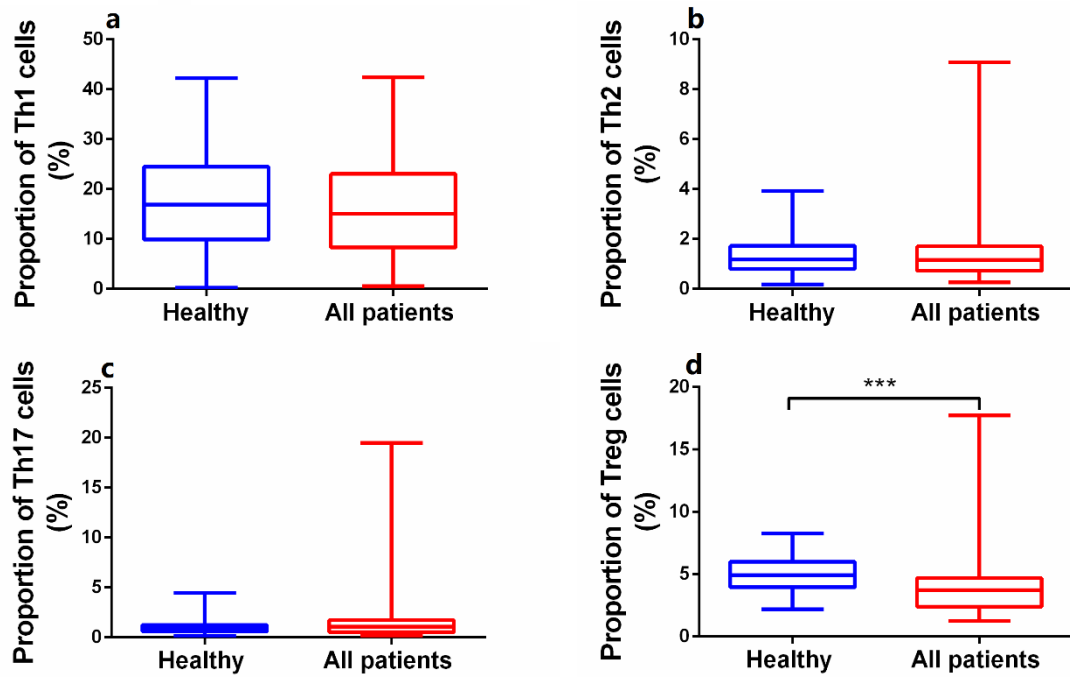

**Supplementary Figure 1: Comparison of percentage of peripheral CD4<sup>+</sup>T subsets between PsA patients (n=95) and healthy controls (n=106).** (a, b, and c) No statistically significant difference in the proportion of Th1, Th2 and Th17 between patients and healthy controls. (d) The proportion of Tregs was significantly reduced in patients with PsA. Data were calculated and compared with Mann-Whitney *U* test and were presented as median (range). \*\*\**P* < 0.001. Asymptotic significances (2-sided tests) were displayed. The significance level was *P* < 0.05.

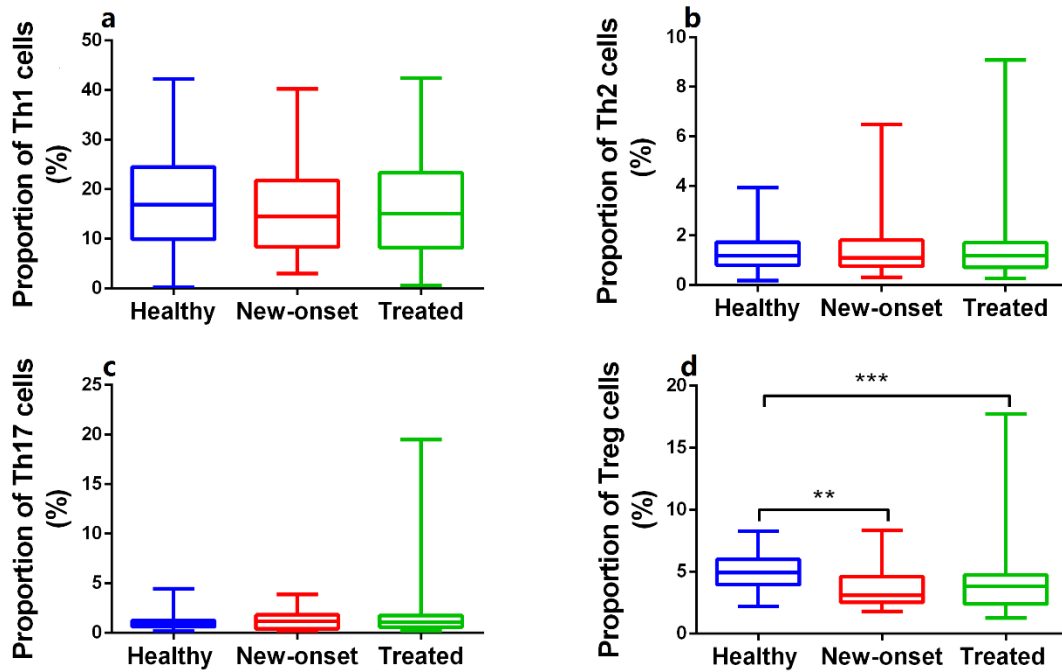

**Supplementary Figure 2: The differences of proportion of CD4<sup>+</sup>T subgroups between PsA patients (including new onset and treated) and healthy controls.** (a, b, and c) Proportion of Th1, Th2, and Th17 cells in PB were not significantly different among the healthy controls (n=106), new onset (n=21) and treated patients (n=74). (d) The percentage of Tregs in PB was lower in PsA patients (including new and treated) than healthy controls, while there was no statistical difference between new-onset and treated patients in that. Data were presented as median (range). Statistical analysis was performed using the Independent-Samples Kruskal-Wallis H test. \*\* $P < 0.01$ , \*\*\* $P < 0.001$ . Asymptotic significances (2-sided tests) were displayed. The significance level was  $P < 0.05$ .

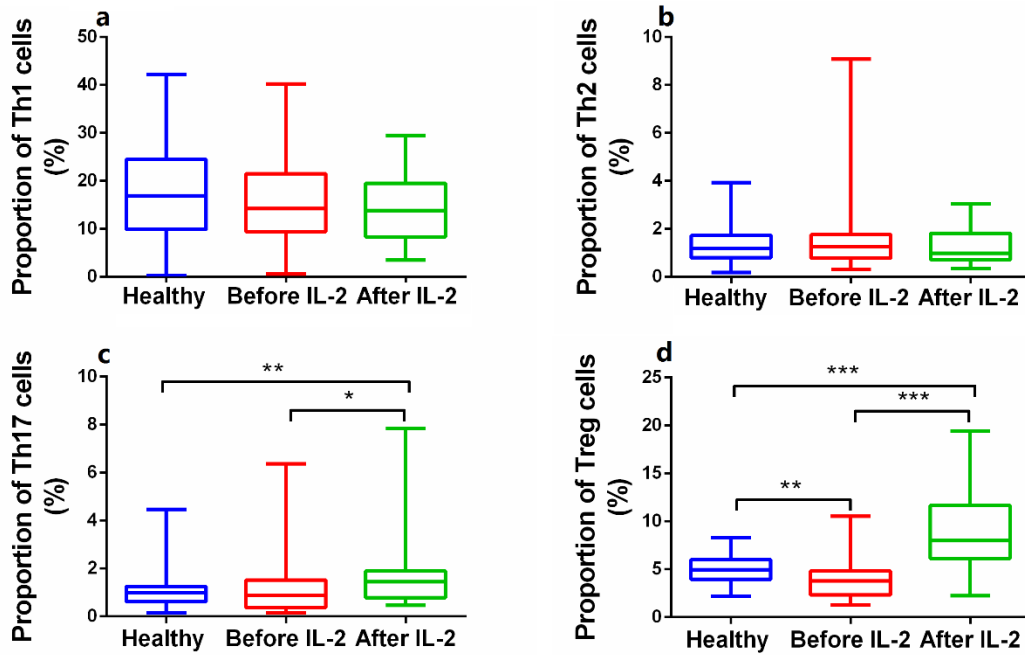

**Supplementary Figure 3: Efficacy of short-term and low-dose IL-2 treatment in regulating percentages of CD4+T subsets.** (a, b) Proportions of Th1, Th2 in PB were no statistical difference between the baseline and after IL-2 treatment. (c and d) Percentages of Th17 and Treg cells in PB, especially Tregs, were significantly increased in patients after IL-2 treatment. Within-group comparisons were made using the Wilcoxon test before (blue) and after (red) IL-2 therapy. \*  $P < 0.05$ , \*\*  $P < 0.01$ , \*\*\*  $P < 0.001$ . Asymptotic significances (2-sided tests) were displayed. The significance level was  $P < 0.05$ .
